# Supplementary material for: Enhancement in the performance of nanostructured CuO–ZnO solar cells by band alignment
Source: Royal Society of Chemistry journal article supplement (doi:10.1039/c9ra10771a), 2020-01-01
Supplement: c9ra10771a1.pdf [file c9ra10771a1.pdf]

## Supplementary Information

### Enhancement in the Performance of Nanostructured CuO-ZnO Solar Cells by Band Alignment

Amrit Kaphle,<sup>1</sup> Elena Echeverria,<sup>2</sup> David N. Mellroy,<sup>2,3</sup> and Parameswar Hari<sup>1,3\*</sup>

<sup>1</sup>Department of Physics and Engineering Physics, University of Tulsa, Tulsa, Oklahoma 74104, USA

<sup>2</sup>Department of Physics, Oklahoma State University, Stillwater, Oklahoma 74078, USA

<sup>3</sup>Oklahoma Photovoltaic Research Institute, University of Tulsa, Tulsa, Oklahoma 74104, USA

\*Corresponding Author: [hari@utulsa.edu](mailto:hari@utulsa.edu)

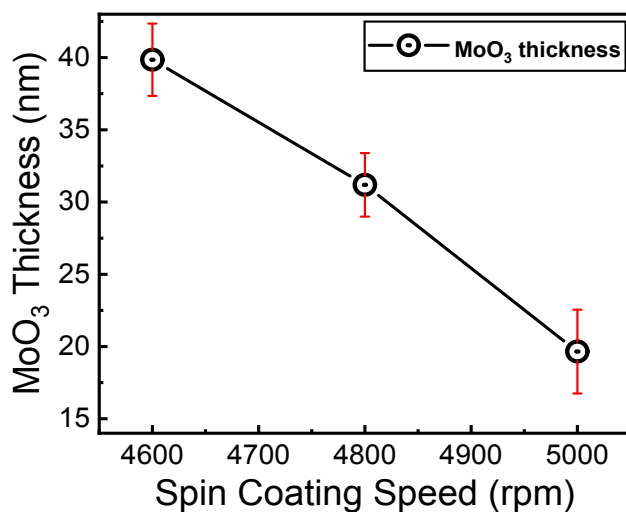

**Fig. S1.** Thickness of MoO<sub>3</sub> thin film as a function of spin coating speed

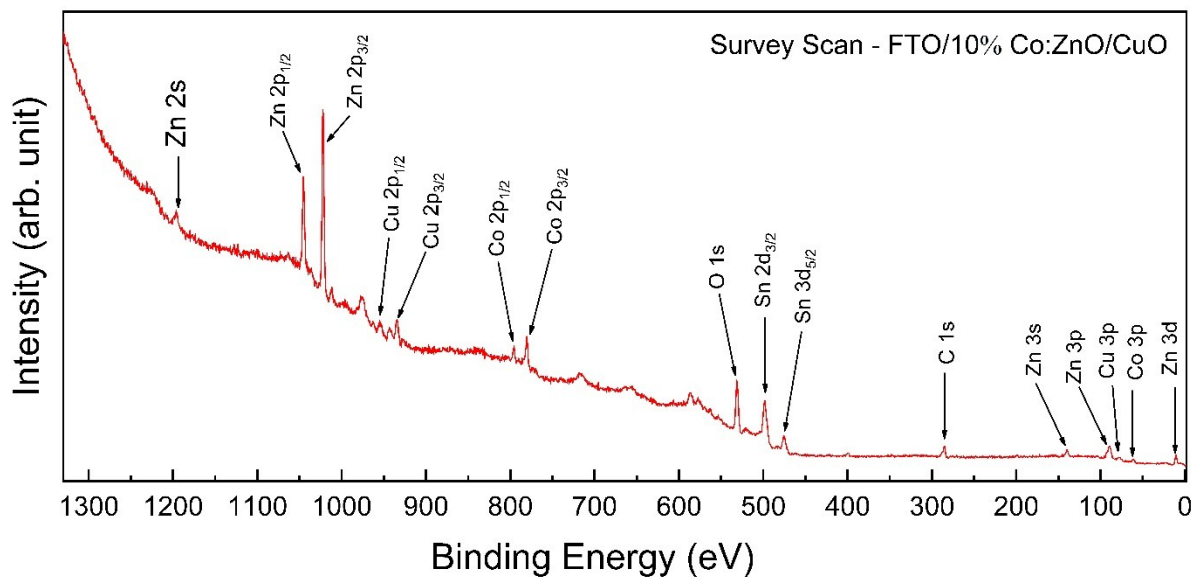

**Fig. S2.** Full scan survey spectra of 10% cobalt doped ZnO/CuO heterojunction solar cell

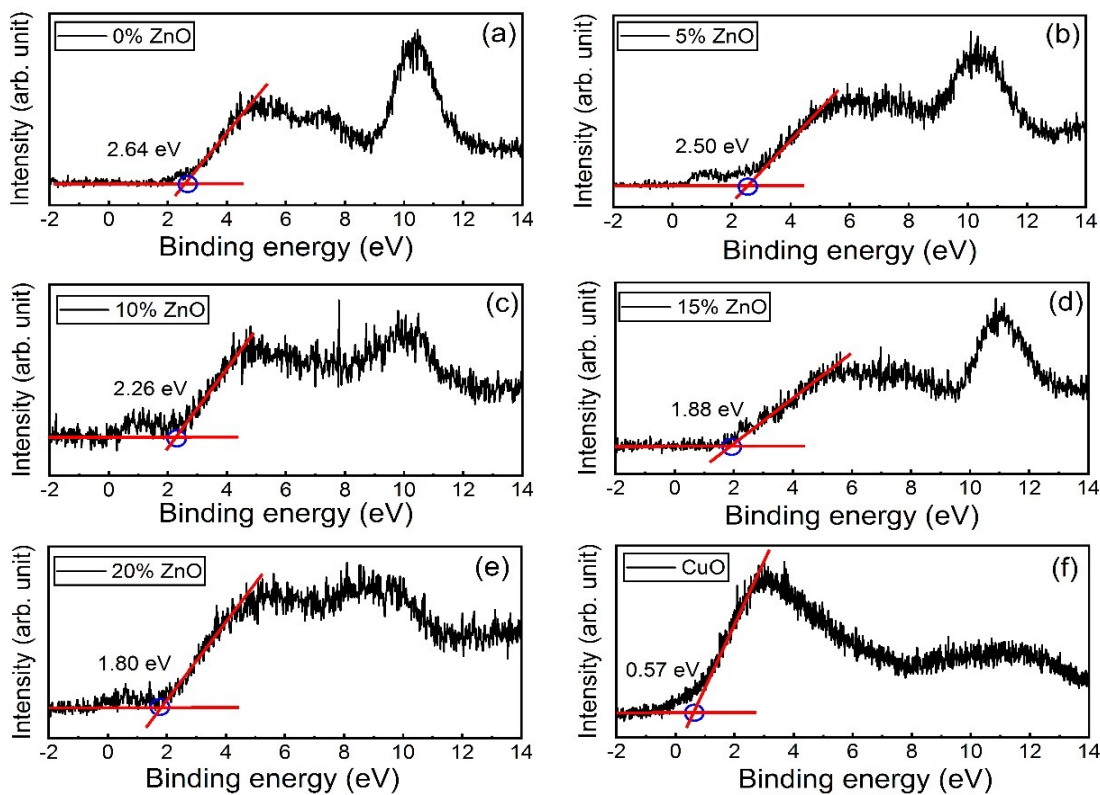

**Fig. S3.** VB spectra of (a) 0% (b) 5% (c) 10% (d) 15% (e) 20% cobalt doped ZnO nanorods and (f) CuO nanostructures

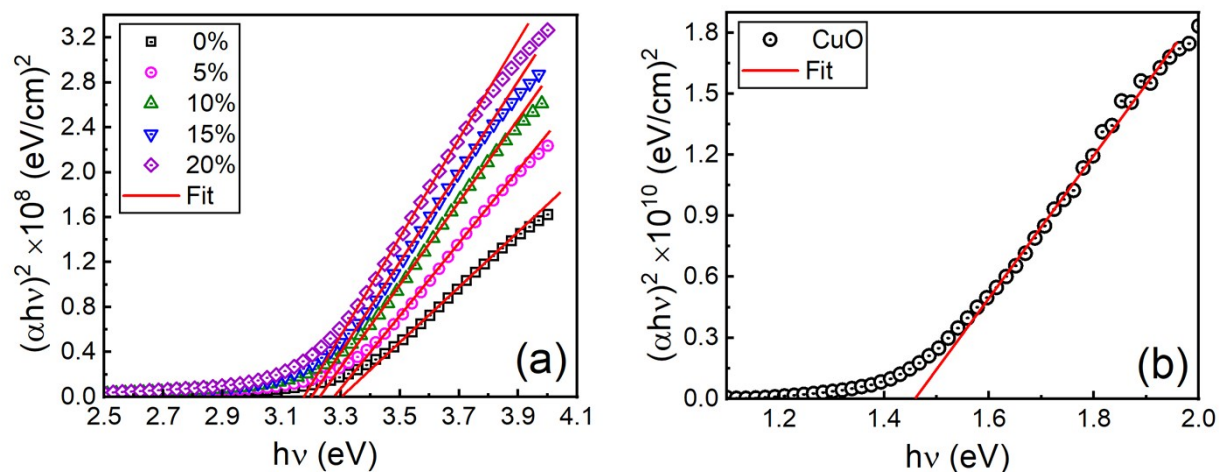

**Fig. S4.** Tauc plot for calculating bandgap of (a) 0-20% cobalt doped ZnO and (b) CuO nanostructures

**Table S1.** Rietveld analysis of 0-20% cobalt doped ZnO samples

| Co % | Phase (%)                                | a (Å)   | c (Å)   | V (Å) <sup>3</sup> | D (nm)  | R <sub>wp</sub> (%) | R <sub>p</sub> (%) | R <sub>e</sub> (%) | S    | χ <sup>2</sup> |
|------|------------------------------------------|---------|---------|--------------------|---------|---------------------|--------------------|--------------------|------|----------------|
| 0    | ZnO (100%)                               | 3.25001 | 5.20603 | 47.62050           | 50.0152 | 2.31                | 1.72               | 1.95               | 1.18 | 1.62           |
| 5    | ZnO (100%)                               | 3.25026 | 5.20621 | 47.62947           | 54.7359 | 2.48                | 1.81               | 1.81               | 1.37 | 1.59           |
| 10   | ZnO (95.6%)                              | 3.25063 | 5.20641 | 47.64215           | 61.1884 | 2.29                | 1.72               | 1.89               | 1.21 | 1.64           |
|      | ZnCo <sub>2</sub> O <sub>4</sub> (4.4%)  | 8.05246 | -       | 522.139            | 18.3307 |                     |                    |                    |      |                |
| 15   | ZnO (86.5%)                              | 3.25117 | 5.20764 | 47.66924           | 68.2005 | 2.51                | 1.78               | 1.94               | 1.29 | 1.78           |
|      | ZnCo <sub>2</sub> O <sub>4</sub> (13.5%) | 8.07631 | -       | 526.792            | 19.0952 |                     |                    |                    |      |                |
| 20   | ZnO (84.9%)                              | 3.25139 | 5.20836 | 47.68228           | 73.2398 | 2.67                | 1.69               | 2.01               | 1.33 | 1.81           |
|      | ZnCo <sub>2</sub> O <sub>4</sub> (15.1%) | 8.08134 | -       | 527.776            | 22.1495 |                     |                    |                    |      |                |

**Table S2.** Average photovoltaic parameters for 0-20% cobalt doped ZnO/CuO heterojunction devices

| Co% | $V_{OC}$ (V)  | $J_{SC}$ (mA/cm <sup>2</sup> ) | FF (%)       | $\eta$ (%)   | $R_S$ ( $\Omega$ cm <sup>2</sup> ) | $R_{SH}$ ( $\Omega$ cm <sup>2</sup> ) |
|-----|---------------|--------------------------------|--------------|--------------|------------------------------------|---------------------------------------|
| 0   | 0.4124±0.0086 | 8.105±0.1997                   | 46.01±0.2339 | 1.473±0.0656 | 42.96±0.5969                       | 576.9±9.982                           |
| 5   | 0.4351±0.0060 | 8.753±0.1784                   | 47.31±0.2823 | 1.749±0.0618 | 39.90±0.6614                       | 607.8±10.18                           |
| 10  | 0.4544±0.0075 | 9.174±0.2060                   | 48.22±0.2446 | 1.870±0.0246 | 37.69±0.5012                       | 641.0±7.212                           |
| 15  | 0.4398±0.0062 | 7.650±0.3889                   | 47.19±0.2195 | 1.486±0.0374 | 38.37±0.5904                       | 582.5±5.749                           |
| 20  | 0.4369±0.0076 | 6.069±0.2747                   | 46.07±0.1728 | 1.387±0.0281 | 38.95±0.5631                       | 584.3±11.82                           |

**Table S3.** Average parameter extracted from dark J-V analysis for 0-20% cobalt doped ZnO/CuO heterojunction devices

| Co% | n            | $J_0 \times 10^{-4}$ (mA/cm <sup>2</sup> ) | $R_S$ ( $\Omega$ cm <sup>2</sup> ) | $R_{SH}$ ( $\Omega$ cm <sup>2</sup> ) |
|-----|--------------|--------------------------------------------|------------------------------------|---------------------------------------|
| 0   | 3.393±0.0649 | 8.382±0.2142                               | 30.88±0.5554                       | 736.4±12.73                           |
| 5   | 3.196±0.0612 | 6.139±0.3371                               | 28.96±0.5163                       | 776.3±12.04                           |
| 10  | 2.986±0.0657 | 4.754±0.3038                               | 27.64±0.5332                       | 827.6±10.01                           |
| 15  | 3.635±0.0568 | 9.025±0.2739                               | 35.81±0.6267                       | 659.7±12.16                           |
| 20  | 3.840±0.0563 | 9.501±0.2361                               | 37.33±0.7151                       | 617.7±10.77                           |

**Table S4.** Parameter extracted from RC circuit fitting of 10% cobalt doped ZnO/CuO heterojunction samples with 0-40 nm thick MoO<sub>3</sub> layers.

| MoO <sub>3</sub><br>(nm) | $R_S$<br>( $\Omega$ ) | $R_{tr}$<br>(k $\Omega$ ) | $R_{rec}$<br>(k $\Omega$ ) | $CPE_{tr}$<br>(nF) | n1    | $CPE_{\mu}$<br>(nF) | n2    | $C_{tr}$<br>(nF) | $C_{\mu}$<br>(nF) | $\tau = R_{rec}C_{\mu}$<br>( $\mu$ S) |
|--------------------------|-----------------------|---------------------------|----------------------------|--------------------|-------|---------------------|-------|------------------|-------------------|---------------------------------------|
| 0                        | 17.4                  | 0.573                     | 7.97                       | 14.5               | 0.870 | 19.3                | 0.900 | 2.52             | 7.28              | 58.0                                  |
| 20                       | 16.9                  | 0.322                     | 8.34                       | 11.7               | 0.890 | 13.9                | 0.950 | 2.50             | 8.63              | 71.9                                  |
| 30                       | 17.1                  | 0.805                     | 7.75                       | 13.3               | 0.880 | 16.2                | 0.920 | 2.79             | 7.42              | 57.5                                  |
| 40                       | 16.6                  | 1.48                      | 7.02                       | 15.7               | 0.830 | 22.3                | 0.890 | 1.77             | 7.55              | 53.1                                  |
